# Supplementary material for: Marek’s Disease Virus Regulates the Ubiquitylome of Chicken CD4+ T Cells to Promote Tumorigenesis
Source: MDPI journal article supplement (doi:10.3390/ijms20092089), 2019-04-28
Supplement: s1 [file s1]

附件

吉林大学动物实验伦理福利审查表

编号(Number of permit):

The Tab of Animal Experimental Ethical Inspection, JLU

201602014

|                                                                                                                                                                                                                                                                                                                                                                                     |                                                                                                                                                                                                                                                                                                                                                                                                                                                                                                                                                                                                                                                                                                                                             |                                                                                     |                                             |                                                                                               |  |
|-------------------------------------------------------------------------------------------------------------------------------------------------------------------------------------------------------------------------------------------------------------------------------------------------------------------------------------------------------------------------------------|---------------------------------------------------------------------------------------------------------------------------------------------------------------------------------------------------------------------------------------------------------------------------------------------------------------------------------------------------------------------------------------------------------------------------------------------------------------------------------------------------------------------------------------------------------------------------------------------------------------------------------------------------------------------------------------------------------------------------------------------|-------------------------------------------------------------------------------------|---------------------------------------------|-----------------------------------------------------------------------------------------------|--|
| 申请人填写的相关信息<br>(Concerned information wrote by applicant)                                                                                                                                                                                                                                                                                                                            | 申请单位<br>(Name of organization):                                                                                                                                                                                                                                                                                                                                                                                                                                                                                                                                                                                                                                                                                                             |                                                                                     | College of Animal Science, Jilin University |                                                                                               |  |
|                                                                                                                                                                                                                                                                                                                                                                                     | 申请人学历(Education of applicant) Ph.D.                                                                                                                                                                                                                                                                                                                                                                                                                                                                                                                                                                                                                                                                                                         |                                                                                     | 技术职称(Professional title): Professor         |                                                                                               |  |
|                                                                                                                                                                                                                                                                                                                                                                                     |                                                                                                                                                                                                                                                                                                                                                                                                                                                                                                                                                                                                                                                                                                                                             |                                                                                     | 岗位证书编号(Certificate): 220106197202089610     |                                                                                               |  |
|                                                                                                                                                                                                                                                                                                                                                                                     | 实验名称(Study title): Marek's Disease Virus Induces Lymphoma by Altering the Ubiquitylome of Chicken T Lymphocytes                                                                                                                                                                                                                                                                                                                                                                                                                                                                                                                                                                                                                             |                                                                                     |                                             |                                                                                               |  |
|                                                                                                                                                                                                                                                                                                                                                                                     | 实验目的(Aim of experiment): The isolation of T lymphocytes of chicken spleen                                                                                                                                                                                                                                                                                                                                                                                                                                                                                                                                                                                                                                                                   |                                                                                     |                                             |                                                                                               |  |
|                                                                                                                                                                                                                                                                                                                                                                                     | 拟进动物情况                                                                                                                                                                                                                                                                                                                                                                                                                                                                                                                                                                                                                                                                                                                                      | 动物来源(Source of animal):<br>Merial, Inc., Beijing                                    |                                             |                                                                                               |  |
|                                                                                                                                                                                                                                                                                                                                                                                     |                                                                                                                                                                                                                                                                                                                                                                                                                                                                                                                                                                                                                                                                                                                                             | 品种品系(Species or strain): White Leghorn 等级(Grade): SPF 规格(Specifications): 1-day-old |                                             |                                                                                               |  |
|                                                                                                                                                                                                                                                                                                                                                                                     |                                                                                                                                                                                                                                                                                                                                                                                                                                                                                                                                                                                                                                                                                                                                             | 数量(Number): 30                                                                      |                                             | 申请日期(Application date): 15 February, 2016                                                     |  |
| 进驻日期(Entering date): 1st March, 2016                                                                                                                                                                                                                                                                                                                                                |                                                                                                                                                                                                                                                                                                                                                                                                                                                                                                                                                                                                                                                                                                                                             | 结束日期(Ending date): 1st October, 2016                                                |                                             |                                                                                               |  |
| 实验要点, 包括实验方法、观测指标、实验结束后处死动物的方法等(Outline of experiments, experimental methods, observational index, executing animal method et. al): Chicken are killed by inhalation of carbon dioxide. The spleen of chick is removed under aseptic conditions immediately for T cells isolation. After the experiment, the chicken carcasses are treated in a centralized and harmless treatment. |                                                                                                                                                                                                                                                                                                                                                                                                                                                                                                                                                                                                                                                                                                                                             |                                                                                     |                                             |                                                                                               |  |
| 申请人签名(Signature of applicant): <i>Yongxing ai</i> 联系电话(Telephone): +86-13804314800                                                                                                                                                                                                                                                                                                  |                                                                                                                                                                                                                                                                                                                                                                                                                                                                                                                                                                                                                                                                                                                                             |                                                                                     |                                             |                                                                                               |  |
| 审查依据<br>(Inspection contents)                                                                                                                                                                                                                                                                                                                                                       | 1. 该项目是否必须用实验动物进行实验, 即能否用计算机模拟、细胞培养等非生命方法替代动物或用低等动物替代高等动物进行实验(Does laboratory animal must be used in the project? Could other methods such as computer simulation, cell cultivation or using the low-grade animal instead of the high-grade animal)?<br>2. 表中所填申请人资格和所用动物的品种品系、质量等级、规格是否合适, 能否通过改良设计方案或用高质量的动物来减少所用动物的数量(Are the qualification of applicant, species or strain, grade and specifications of animals suitable? Could the quantity of animals be reduced by improving the study design or using high quality animals)?<br>3. 能否通过改进实验方法、调整实验观测指标、改良处死动物的方法, 来优化实验方案、善待动物(Could the study design and animal treatment be refined by ameliorating experimental method, adjusting observational index, executing animal method)? |                                                                                     |                                             |                                                                                               |  |
| 审查结果<br>(是否同意申请人的实验方案)<br>(Results of inspection)                                                                                                                                                                                                                                                                                                                                   | 委员会专家意见<br>(Study director):                                                                                                                                                                                                                                                                                                                                                                                                                                                                                                                                                                                                                                                                                                                | 同意<br>(Agree) <input checked="" type="checkbox"/>                                   | 不同意<br>(Disagree) <input type="checkbox"/>  | 签名<br>(Signature) <i>张立华</i>                                                                  |  |
|                                                                                                                                                                                                                                                                                                                                                                                     | 吉林大学实验动物福利伦理委员会<br>(Institutional Animal Care and Use Committee of Jilin University, IACUC):                                                                                                                                                                                                                                                                                                                                                                                                                                                                                                                                                                                                                                                | 同意<br>(Agree) <input checked="" type="checkbox"/>                                   | 不同意<br>(Disagree) <input type="checkbox"/>  | 盖章(Stamp)  |  |
| 备注(Supplement):                                                                                                                                                                                                                                                                                                                                                                     |                                                                                                                                                                                                                                                                                                                                                                                                                                                                                                                                                                                                                                                                                                                                             |                                                                                     |                                             |                                                                                               |  |
