# Supplementary figures and images for: Marek’s Disease Virus Regulates the Ubiquitylome of Chicken CD4+ T Cells to Promote Tumorigenesis
Source: MDPI journal article supplement (doi:10.3390/ijms20092089), 2019-04-28

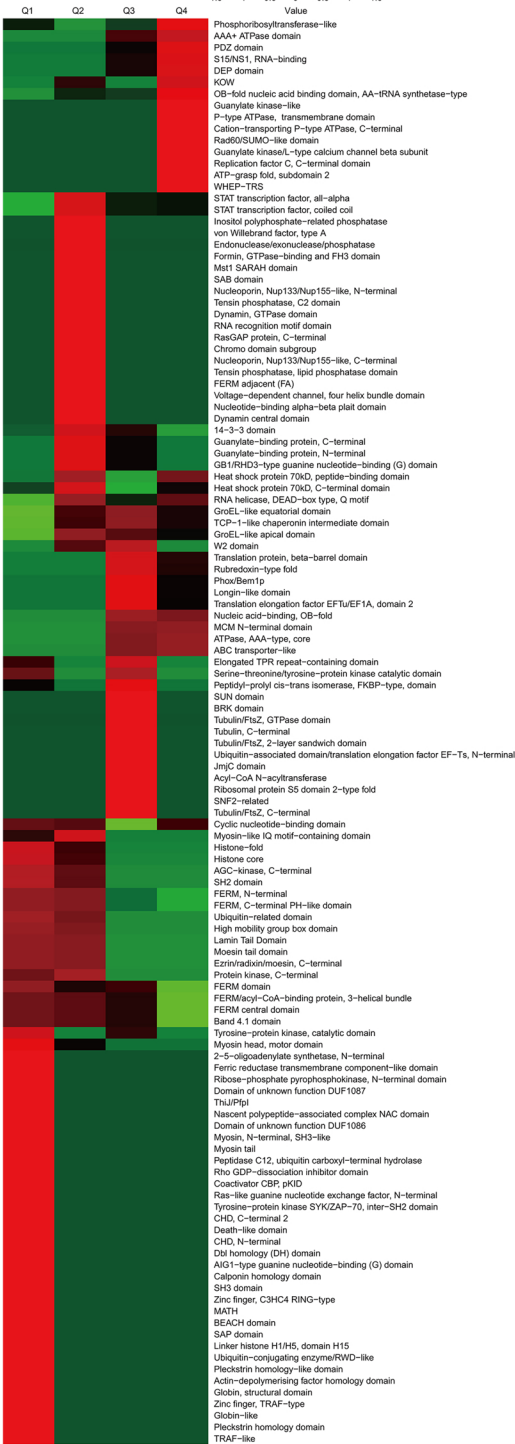

Supplement: s1 [file s1]
